# Supplementary material
Source: publisher figshare collection journal article supplement (https://asha.figshare.com/articles/dataset/_/7403963)
Supplement: Supplementary file 1 [file 1]

**Supplemental Material S1.** Participant demographic information.

| <b>ID</b>        | <b>Age</b> | <b>MPO</b> | <b>Education</b> | <b>Sex</b> | <b>Handedness</b> | <b>CAT Spoken<br/>Comprehension<br/>(cutoff 56)</b> | <b>CAT<br/>Naming<br/>(cutoff 69)</b> | <b>CAT<br/>Repetition<br/>(cutoff 48)<sup>a</sup></b> | <b>CAT Picture<br/>Description<br/>(cut off 33)</b> |
|------------------|------------|------------|------------------|------------|-------------------|-----------------------------------------------------|---------------------------------------|-------------------------------------------------------|-----------------------------------------------------|
| P1               | 55         | 57         | 14               | F          | R                 | 44                                                  | 57                                    | 40                                                    | 11                                                  |
| P2               | 77         | 47         | 13               | F          | R                 | 59                                                  | 69                                    | 44                                                    | 31.5                                                |
| P3               | 31         | 71         | 14               | M          | R                 | 40                                                  | 58                                    | 46                                                    | 18.5                                                |
| P4               | 62         | 82         | 16               | M          | R                 | 56                                                  | 72                                    | 42                                                    | 29                                                  |
| P5               | 71         | 112        | 14               | M          | L                 | 51                                                  | 35                                    | 28                                                    | 11.5                                                |
| P6               | 71         | 216        | 14               | F          | R                 | 44                                                  | 58                                    | 34                                                    | 21.5                                                |
| P7               | 64         | 135        | 16               | F          | R                 | 40                                                  | 56                                    | 35                                                    | 22                                                  |
| P8               | 70         | 60         | 18               | M          | R                 | 56                                                  | 49                                    | 39                                                    | 19.5                                                |
| P9               | 58         | 131        | 18               | M          | L                 | 41                                                  | 42                                    | 34                                                    | 10                                                  |
| P10              | 67         | 65         | 16               | M          | R                 | 43                                                  | 1                                     | 20                                                    | 4                                                   |
| P11              | 55         | 79         | 16               | M          | R                 | 51                                                  | 67                                    | 44                                                    | 30                                                  |
| P12              | 45         | 16         | 16               | F          | R                 | 56                                                  | 63                                    | 48                                                    | 21                                                  |
| P13              | 61         | 76         | 14               | F          | R                 | 42                                                  | 46                                    | 32                                                    | 17.5                                                |
| P14              | 51         | 74         | 12               | F          | R                 | 56                                                  | 58                                    | 48                                                    | 18.5                                                |
| P15              | 68         | 102        | 22               | M          | R                 | 49                                                  | 22                                    | 32                                                    | 15                                                  |
| P16 <sup>b</sup> | 71         | 59         | 20               | F          | R                 | 57                                                  | 76                                    | 46                                                    | 39                                                  |
| P17              | 47         | 28         | 17               | F          | R                 | 57                                                  | 61                                    | 30                                                    | 23                                                  |
| P18              | 72         | 156        | 16               | M          | R                 | 54                                                  | 61                                    | 39                                                    | 20                                                  |
| P19              | 64         | 59         | 17               | F          | R                 | 58                                                  | 77                                    | 42                                                    | 28                                                  |
| P20              | 73         | 38         | 18               | F          | R                 | 60                                                  | 67                                    | 40                                                    | 30                                                  |
| P21              | 59         | 118        | 21               | F          | R                 | 43                                                  | 38                                    | 48                                                    | 12                                                  |
| P22              | 71         | 91         | 12               | F          | R                 | 32                                                  | 10                                    | 28                                                    | 7.5                                                 |
| P23              | 92         | 18         | 18               | F          | R                 | 29                                                  | 15                                    | 6                                                     | 14.5                                                |
| P24              | 65         | 48         | 17               | F          | R                 | 58                                                  | 57                                    | 46                                                    | 29.5                                                |
| P25              | 77         | 132        | 18               | M          | R                 | 43                                                  | 2                                     | 8                                                     | 7.5                                                 |
| P26              | 66         | 109        | 16               | M          | R                 | 36                                                  | 16                                    | 0                                                     | –3                                                  |

|                  |       |       |       |            |   |           |       |       |       |
|------------------|-------|-------|-------|------------|---|-----------|-------|-------|-------|
| P27              | 58    | 28    | 12    | M          | R | 55        | 55    | 22    | 21    |
| P29              | 47    | 91    | 13    | M          | L | 40        | 21    | 44    | 3.5   |
| P30              | 42    | 139   | 18    | M          | R | 46        | 60    | 23    | 36.5  |
| P33 <sup>b</sup> | 68    | 46    | 12    | M          | R | 61        | 79    | 48    | 47    |
| P34              | 63    | 50    | 13    | M          | R | 55        | 39    | 40    | 23    |
| P35              | 56    | 22    | 15    | M          | R | 64        | 72    | 42    | 24    |
| P36              | 66    | 11    | 16    | M          | R | 56        | 60    | 46    | 16    |
| P37              | 62    | 8     | 16    | M          | R | 55        | 56    | 42    | 31    |
| P38              | 73    | 11    | 14    | F          | R | 30        | 15    | 23    | 0.5   |
| P39              | 69    | 46    | 12    | M          | R | 51        | 45    | 34    | 10    |
| P41              | 57    | 51    | 12    | M          | R | 42        | 16    | 16    | 3     |
| P42              | 71    | 32    | 20    | M          | R | 47        | 26    | 36    | 6.5   |
| P43              | 38    | 47    | 12    | F          | R | 54        | 50    | 48    | 17    |
| P44              | 58    | 96    | 18    | F          | L | 32        | 17    | 12    | 6     |
| P45              | 55    | 26    | 16    | M          | R | 49        | 20    | 46    | 24.5  |
| P46              | 66    | 22    | 18    | M          | R | 54        | 77    | 46    | 27.5  |
| P47              | 59    | 69    | 16    | M          | R | 48        | 68    | 48    | 17.5  |
|                  |       |       |       | 25 M, 18 F |   | 39 R, 4 L |       |       |       |
| <b>M</b>         | 62.12 | 69.16 | 15.72 |            |   | 48.70     | 46.72 | 35.23 | 18.67 |
| <b>SD</b>        | 11.39 | 45.42 | 2.62  |            |   | 9.00      | 22.68 | 12.72 | 10.94 |
| <b>Range</b>     | 31–92 | 8–216 | 12–22 |            |   | 29–64     | 1–79  | 0–48  | –3–47 |

*Note.* MPO = months post-stroke onset; M = male; F = female; R = right-handed; L = left-handed; CAT = Comprehensive Aphasia Test (Swinburn et al., 2004).

<sup>a</sup>Only repetition of words and nonwords (CAT subtests 12–14) was administered. <sup>b</sup>P16 and P33 scored above cut-off scores on 3/4 subtests; however, they were included due to demonstration of marked language difficulties during conversational speech and experimental testing.

## Reference

Swinburn, K., Porter, G., & Howard, D. (2004). *Comprehensive Aphasia Test (CAT)*. New York, NY: Psychology Press.
