# Supplementary material
Source: publisher figshare collection journal article supplement (https://asha.figshare.com/articles/dataset/_/7403963)
Supplement: Supplementary file 2 [file 1]

## Supplemental Material S2. Correlation tables for each language domain.

### *Semantic tasks*

|          | CCT   | PALPA 47 | PALPA 49 | PALPA 57 |
|----------|-------|----------|----------|----------|
| CCT      | —     |          |          |          |
| PALPA 47 | .51** | —        |          |          |
| PALPA 49 | .68** | .67**    | —        |          |
| PALPA 57 | .45** | .57**    | .71**    | —        |

*Note.* CCT = Camel and Cactus Test (Adlam et al., 2010); PALPA = Psycholinguistic Assessment of Language Processing in Aphasia (Kay et al., 1992).

\* $p < .05$ . \*\* $p < .01$ . \*\*\* $p < .001$ .

### *Phonologic tasks*

|                | SAPA min pairs | SAPA RW rhyme | SAPA NW rhyme | LAC |
|----------------|----------------|---------------|---------------|-----|
| SAPA min pairs | —              |               |               |     |
| SAPA RW rhyme  | .41**          | —             |               |     |
| SAPA NW rhyme  | .35*           | .74**         | —             |     |
| LAC            | .26            | .36*          | .33*          | —   |

*Note.* SAPA = Standardized Assessment of Phonology in Aphasia (Kendall et al., 2010); LAC = Lindamood Auditory Conceptualization Test (Lindamood & Lindamood, 1979).

\* $p < .05$ . \*\* $p < .01$ . \*\*\* $p < .001$ .

### *Syntactic tasks*

|          | PALPA 55 | PALPA 58 | CAT 9 |
|----------|----------|----------|-------|
| PALPA 55 | —        |          |       |
| PALPA 58 | .76**    | —        |       |
| CAT 9    | .85**    | .71**    | —     |

*Note.* PALPA = Psycholinguistic Assessment of Language Processing in Aphasia (Kay et al., 1992); CAT = Comprehensive Aphasia Test (Swinburn et al., 2004).

\* $p < .05$ . \*\* $p < .01$ . \*\*\* $p < .001$ .

### *Oral reading tasks*

|                       | ABRS regular | ABRS irregular | ABRS nonwords | SAPA pseudohomophones |
|-----------------------|--------------|----------------|---------------|-----------------------|
| ABRS regular          | —            |                |               |                       |
| ABRS irregular        | .98**        | —              |               |                       |
| ABRS nonwords         | .69**        | .70**          | —             |                       |
| SAPA pseudohomophones | .78**        | .81**          | .87**         | —                     |

*Note.* ABRs = Arizona Battery for Reading and Spelling (Beeson et al., 2010); SAPA = Standardized Assessment of Phonology in Aphasia (Kendall et al., 2010).

\* $p < .05$ . \*\* $p < .01$ . \*\*\* $p < .001$ .

## Silent reading comprehension tasks

|          | Single Words |          |          | Sentences |          |        | Paragraphs |        |        |
|----------|--------------|----------|----------|-----------|----------|--------|------------|--------|--------|
|          | CAT 8        | PALPA 50 | PALPA 51 | CAT 10    | PALPA 59 | RCBA 4 | RCBA 7     | RCBA 8 | RCBA 9 |
| CAT 8    | --           |          |          |           |          |        |            |        |        |
| PALPA 50 | .64**        | --       |          |           |          |        |            |        |        |
| PALPA 51 | .63**        | .81**    | --       |           |          |        |            |        |        |
| CAT 10   | .67**        | .75**    | .66**    | --        |          |        |            |        |        |
| PALPA 59 | .69**        | .62**    | .60**    | .78**     | --       |        |            |        |        |
| RCBA 4   | .60**        | .67**    | .75**    | .55**     | .54**    | --     |            |        |        |
| RCBA 7   | .59**        | .59**    | .62**    | .62**     | .71**    | .57**  | --         |        |        |
| RCBA 8   | .64**        | .78**    | .82**    | .66**     | .60**    | .73**  | .64**      | --     |        |
| RCBA 9   | .68**        | .76**    | .75**    | .75**     | .72**    | .76**  | .68**      | .87**  | --     |

Note. CAT = Comprehensive Aphasia Test (Swinburn et al., 2004); PALPA = Psycholinguistic Assessment of Language Processing in Aphasia (Kay et al., 1992); RCBA = Reading Comprehension Battery for Aphasia (LaPointe & Horner, 1984).

\* $p < .05$ . \*\* $p < .01$ . \*\*\* $p < .001$ .

## References

- Adlam, A. R., Patterson, K., Bozeat, S., & Hodges, J. R. (2010). The Cambridge semantic memory test battery: Detection of semantic deficits in semantic dementia and Alzheimer’s disease. *Neurocase*, 16(3), 193–207. <https://doi.org/10.1080/13554790903405693>
- Beeson, P. M., Rising, K., Kim, E. S., & Rapcsak, S. Z. (2010). A treatment sequence for phonological alexia/agraphia. *Journal of Speech, Language, and Hearing Research*, 53, 450–468. [https://doi.org/10.1044/1092-4388\(2009/08-0229\)](https://doi.org/10.1044/1092-4388(2009/08-0229))
- Kay, J., Coltheart, M., & Lesser, R. (1992). *Psycholinguistic Assessments of Language Processing in Aphasia (PALPA)*. Hove, United Kingdom: Psychology Press.
- Kendall, D. L., del Toro, C., Nadeau, S., Johnson, J., Rosenbek, J., & Velozo, C. (2010, June). *The development of a standardized assessment of phonology in aphasia*. Paper presented at the Clinical Aphasiology Conference, Isle of Palm, SC.
- LaPointe, L. L., & Horner, J. (1984). *Reading Comprehension Battery for Aphasia (RCBA)*. Tigard, OR: CC Publications.
- Lindamood, C. H., & Lindamood, P. C. (1979). *The LAC Test: The Lindamood Auditory Conceptualization Test*. Austin, TX: Pro-Ed.
- Swinburn, K., Porter, G., & Howard, D. (2004). *Comprehensive Aphasia Test (CAT)*. New York, NY: Psychology Press.
